# Supplementary material
Source: PubMed Central journal article supplement (PMC2206619)

# Left/Right Discrimination (%)

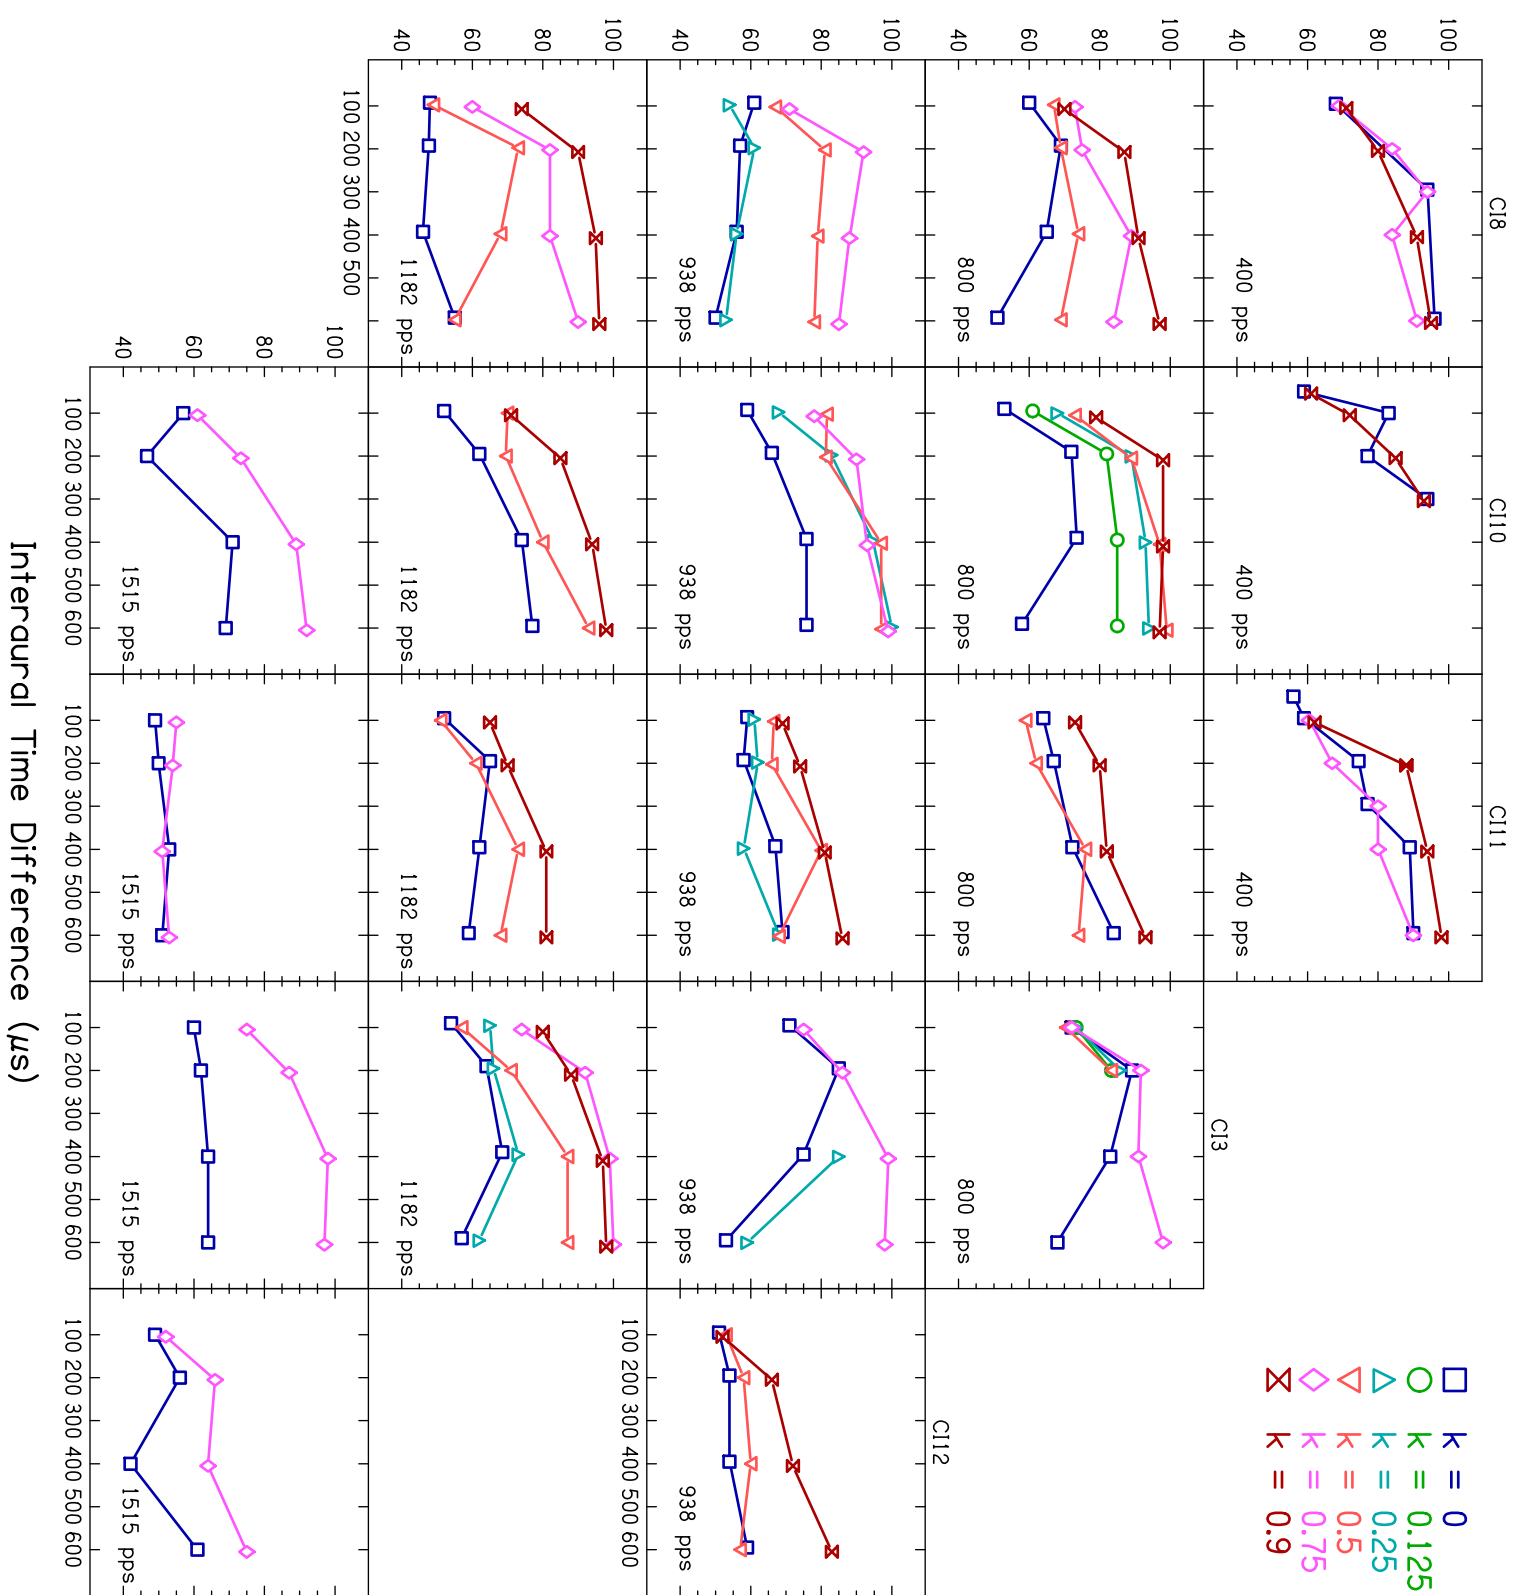

Supplement: pnas_0709199105_1.pdf [file pnas_0709199105_1.pdf]
